# Supplementary material for: Trends in Influenza Vaccination Rates among a Medicaid Population from 2016 to 2021
Source: MDPI journal article supplement (doi:10.3390/vaccines11111712), 2023-11-11
Supplement: s1 [file s1]

## SUPPLEMENTAL MATERIAL

**Figure S1: Sub-season vaccination rate for individuals who were vaccinated in the given influenza season.**

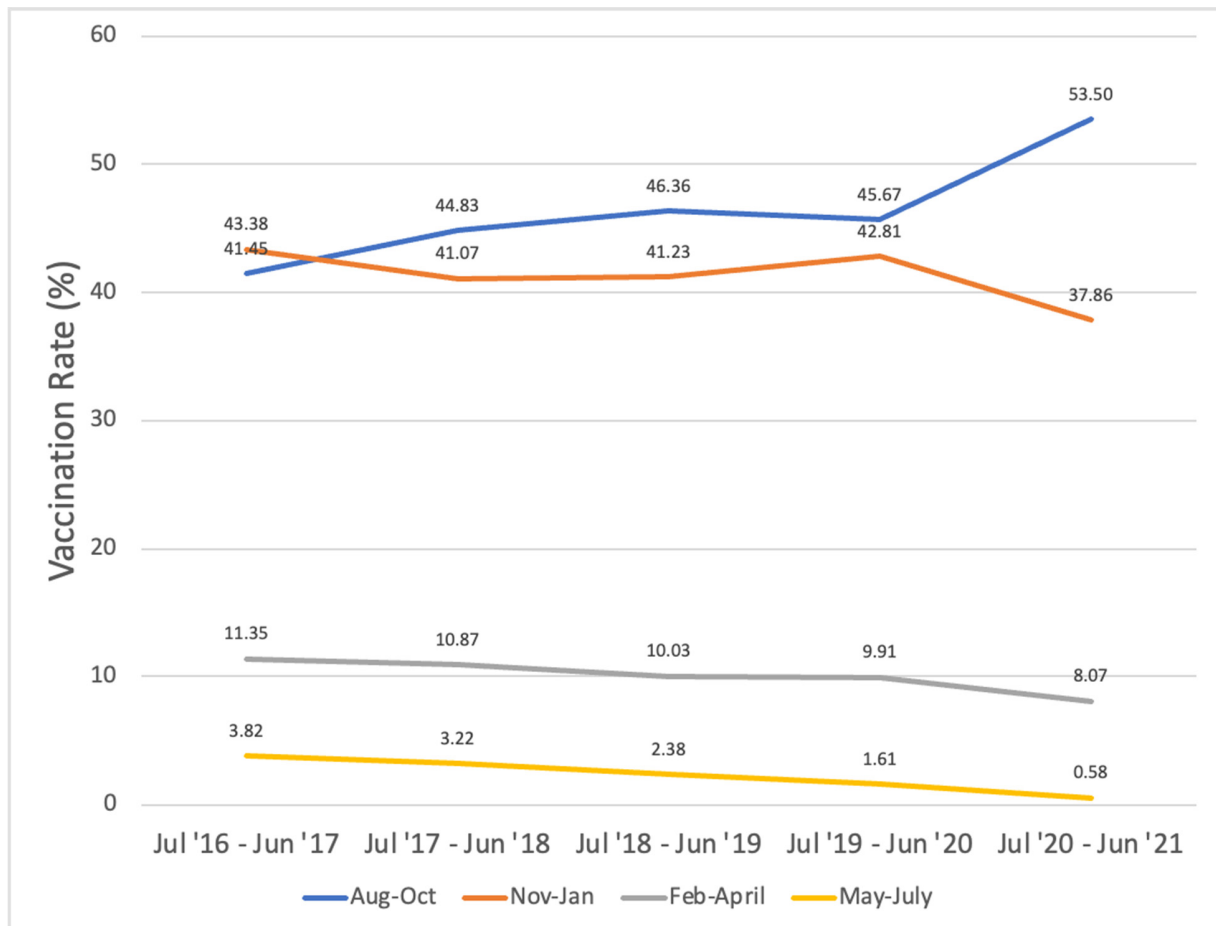

**Table S1:** List of ICD-9 and ICD-10 codes to identify enrollees who had diabetes in the study population.

|                      |                                        |        |
|----------------------|----------------------------------------|--------|
| Diabetes 1           | E10*                                   | ICD-10 |
| Diabetes 2           | E11*                                   | ICD-10 |
| Unspecified Diabetes | E08*, E09*, E13*                       | ICD-10 |
| Diabetes 1           | 250*(1 3) (the code is given in RegEx) | ICD-9  |
| Diabetes 2           | 250*(0 2) (the code is given in RegEx) | ICD-9  |
| Unspecified Diabetes | O24* and '250                          | ICD-9  |

**Table S2:** List of ICD-9 and ICD-10 codes to identify enrollees who were pregnant in the study population.

|           |                                                       |        |
|-----------|-------------------------------------------------------|--------|
| Pregnancy | Z34*, Z36*, O09*, Z3201                               | ICD-10 |
| Delivery  | P95*, Z38*, Z37*, O60*, O82*, O80*, O75*, Z3A*, O4201 | ICD-10 |
| Pregnancy | V7242, V283*, V22*, V23*                              | ICD-9  |
| Delivery  | V27*, V30*, V31*, V32*, V34*, V36*, V37*, V39*        | ICD-9  |

**Table S3:** Rural-Urban Continuum Codes (RUCC) and Descriptions.

| <b>RUCC</b> | <b>Description</b>                                                                 | <b>Category</b>  |
|-------------|------------------------------------------------------------------------------------|------------------|
| 1           | Counties in metro areas of 1 million population or more                            | Metropolitan     |
| 2           | Counties in metro areas of 250,000 to 1 million population                         | Metropolitan     |
| 3           | Counties in metro areas of fewer than 250,000 population                           | Metropolitan     |
| 4           | Urban population of 20,000 or more, adjacent to a metro area                       | Non-Metropolitan |
| 5           | Urban population of 20,000 or more, not adjacent to a metro area                   | Non-Metropolitan |
| 6           | Urban population of 2,500 to 19,999, adjacent to a metro area                      | Non-Metropolitan |
| 7           | Urban population of 2,500 to 19,999, not adjacent to a metro area                  | Non-Metropolitan |
| 8           | Completely rural or less than 2,500 urban population, adjacent to a metro area     | Non-Metropolitan |
| 9           | Completely rural or less than 2,500 urban population, not adjacent to a metro area | Non-Metropolitan |

**Table S4:** List of CPT codes used to determine flu vaccine uptake.

| <b>Codes</b> | <b>Vaccine Codes &amp; Descriptors</b>                                                                                                                             |
|--------------|--------------------------------------------------------------------------------------------------------------------------------------------------------------------|
| 90470        | H1N1 immunization administration (intramuscular, intranasal), including counseling when performed                                                                  |
| 90630        | Influenza virus vaccine, quadrivalent (IIV4), split virus, preservative free, for intradermal use                                                                  |
| 90653        | Influenza vaccine, inactivated (IIV), subunit, adjuvanted, for intramuscular use                                                                                   |
| 90654        | Influenza virus vaccine, trivalent (IIV3), split virus, preservative-free, for intradermal use                                                                     |
| 90655        | Influenza virus vaccine, trivalent (IIV3), split virus, preservative free, when administered to children 6-35 months of age, 0.25ml dosage for intramuscular use   |
| 90656        | Influenza virus vaccine, trivalent (IIV3), split virus, preservative free, when administered to individuals 3 years and older, 0.5mL dosage, for intramuscular use |
| 90657        | Influenza virus vaccine, trivalent (IIV3), split virus, when administered to children 6-35 months of age, 0.25 mL dosage, for intramuscular use                    |
| 90658        | Influenza virus vaccine, trivalent (IIV3), split virus, when administered to individuals 3 years of age and older, 0.5ml dosage, for intramuscular use             |
| 90659        | Influenza virus vaccine, whole virus, for intramuscular or jet injection use                                                                                       |

90660 Influenza virus vaccine, trivalent, live (LAIV3), for intranasal use

90661 Influenza virus vaccine (ccIIV3), derived from cell cultures, subunit, preservative and antibiotic free, for intramuscular use

90662 Influenza virus vaccine (IIV), split virus, preservative free, enhanced immunogenicity via increased antigen content, for intramuscular use

90663 Influenza virus vaccine, pandemic formulation, H1N1

90664 Influenza virus vaccine, live (LAIV), pandemic formulation, for intranasal use

90666 Influenza virus vaccine (IIV), pandemic formulation, split virus, preservative free, for intramuscular use

90667 Influenza virus vaccine, pandemic formulation, split virus, adjuvant, for intramuscular use

90668 Influenza virus vaccine (IIV), pandemic formulation, split virus, for intramuscular use

90672 Influenza virus vaccine, quadrivalent, live (LAIV4), for intranasal use

90673 Influenza virus vaccine, trivalent (RIV3), derived from recombinant DNA, hemagglutinin (HA) protein only, preservative and antibiotic free, for intramuscular use

90674 New in 2017: Influenza virus vaccine, quadrivalent (ccIIV4), derived from cell cultures, subunit, preservative and antibiotic free, 0.5 mL dosage, for intramuscular use

90682 New in 2017: Influenza virus vaccine, quadrivalent (RIV4), derived from recombinant DNA, hemagglutinin (HA) protein only, preservative and antibiotic free, for intramuscular use

90685 Influenza virus vaccine, quadrivalent (IIV4), split virus, preservative free, when administered to children 6-35 months of age, 0.25ml dosage, for intramuscular use

90686 Influenza virus vaccine, quadrivalent (IIV4), split virus, preservative free, 0.5 mL dosage, for intramuscular use

90687 Influenza virus vaccine, quadrivalent (IIV4), split virus, when administered to children 6-35 months of age, for intramuscular use

90688 Influenza virus vaccine, quadrivalent (IIV4), split virus, when administered to individuals 3 years of age and older, 0.5 ml dosage, for intramuscular use

90689 Influenza virus vaccine quadrivalent (IIV4), inactivated, adjuvanted, preservative free, 0.25mL dosage, for intramuscular use

90694 Influenza virus vaccine, quadrivalent (aIIV4), inactivated, adjuvanted, preservative free, 0.5 mL dosage, for intramuscular use

90724 Influenza virus vaccine

90756 Influenza virus vaccine, quadrivalent (ccIIV4), derived from cell cultures, subunit, antibiotic free, 0.5 mL dosage, for intramuscular use

G0008 Administration of influenza virus vaccine

G8108 Patient documented to have received influenza vaccination during influenza season.

|       |                                                                                                                                   |
|-------|-----------------------------------------------------------------------------------------------------------------------------------|
| G8482 | Influenza immunization administered or previously received                                                                        |
| G8639 | Influenza immunization was administered or previously received                                                                    |
| G9141 | Influenza A (H1N1) immunization administration (includes the physician counseling the patient/family)                             |
| G9142 | Influenza A (H1N1) vaccine, any route of administration                                                                           |
| Q2033 | Influenza vaccine, recombinant hemagglutinin antigens, for intramuscular use                                                      |
| Q2034 | Influenza virus vaccine, split virus, for intramuscular use (agriflu)                                                             |
| Q2035 | Influenza virus vaccine, split virus, when administered to individuals 3 years of age and older, for intramuscular use (afluria)  |
| Q2036 | Influenza virus vaccine, split virus, when administered to individuals 3 years of age and older, for intramuscular use (flulaval) |
| Q2037 | Influenza virus vaccine, split virus, when administered to individuals 3 years of age and older, for intramuscular use (fluvirin) |
| Q2038 | Influenza virus vaccine, split virus, when administered to individuals 3 years of age and older, for intramuscular use (fluzone)  |
| Q2039 | Influenza virus vaccine, not otherwise specified                                                                                  |
| V0481 | Need for prophylactic vaccination and inoculation against influenza.                                                              |
| V066  | Need for prophylactic vaccination and inoculation against streptococcus pneumoniae [pneumococcus] and influenza                   |

---

**Table S5:** Number of enrollees who had at least one healthcare encounter (N) and vaccination rates (%) stratified by flu seasons.

|                                                  | Jul '16 –<br>Jun '17 | Jul '17 –<br>Jun '18 | Jul '18 –<br>Jun '19 | Jul '19 –<br>Jun '20 | Jul '20 –<br>Jun '21 |               |
|--------------------------------------------------|----------------------|----------------------|----------------------|----------------------|----------------------|---------------|
| Category                                         | N(%)                 | N(%)                 | N(%)                 | N(%)                 | N(%)                 | P-<br>value** |
| <b>Enrollees with 1+ Encounters, N</b>           | 3,167,653            | 4,834,338            | 4,530,306            | 4,275,226            | 4,061,387            | -             |
| <b>Total Enrollees Vaccinated</b>                | 349,993<br>(11.05)   | 669,645<br>(13.85)   | 688,626<br>(15.20)   | 699,380<br>(16.36)   | 642,827<br>(15.83)   |               |
| <b>Age group</b>                                 |                      |                      |                      |                      |                      |               |
| 6 months - 4 years                               | 310,191<br>(23.36)   | 549,639<br>(26.01)   | 555,466<br>(29.70)   | 592,139<br>(30.69)   | 557,855<br>(30.93)   | <0.0001       |
| 5-17 years                                       | 1,006,662<br>(11.62) | 1,578,325<br>(16.10) | 1,498,394<br>(17.13) | 1,373,693<br>(18.62) | 1,249,369<br>(18.41) | <0.0001       |
| 18-64 years                                      | 1,850,800<br>(8.68)  | 2,706,374<br>(10.07) | 2,476,446<br>(10.78) | 2,309,394<br>(11.34) | 2,254,163<br>(10.66) | <0.0001       |
| <b>Gender</b>                                    |                      |                      |                      |                      |                      |               |
| Female                                           | 1,719,173<br>(11.54) | 2,667,642<br>(14.07) | 2,523,536<br>(15.33) | 2,398,109<br>(16.39) | 2,288,273<br>(15.78) | <0.0001       |
| Male                                             | 1,448,480<br>(10.47) | 2,166,696<br>(13.58) | 2,006,770<br>(15.04) | 1,877,117<br>(16.32) | 1,773,114<br>(15.89) | <0.0001       |
| <b>Metropolitan Area</b>                         |                      |                      |                      |                      |                      |               |
| Metropolitan                                     | 2,423,215<br>(11.08) | 3,861,983<br>(13.91) | 3,623,989<br>(15.28) | 3,448,526<br>(16.40) | 3,328,512<br>(15.84) | <0.0001       |
| Non-Metropolitan                                 | 744,438<br>(10.93)   | 972,355<br>(13.63)   | 906,317<br>(14.89)   | 826,700<br>(16.20)   | 732,875<br>(15.78)   | <0.0001       |
| <b>Greater than median higher education area</b> |                      |                      |                      |                      |                      |               |
| Yes                                              | 1,416,138<br>(11.05) | 2,193,694<br>(13.92) | 2,039,096<br>(15.28) | 1,918,601<br>(16.43) | 1,843,321<br>(15.83) | <0.0001       |
| No                                               | 1,751,515<br>(11.05) | 2,640,644<br>(13.79) | 2,491,210<br>(15.14) | 2,356,625<br>(16.30) | 2,218,066<br>(15.83) | <0.0001       |
| <b>Medicaid Managed Care</b>                     |                      |                      |                      |                      |                      |               |
| With Managed Care Program                        | 573,150<br>(13.32)   | 1,860,218<br>(15.55) | 1,813,880<br>(17.01) | 1,731,513<br>(17.98) | 1,559,059<br>(16.92) | <0.0001       |
| Free-for-service                                 | 2,594,503            | 2,974,120            | 2,716,426            | 2,543,713            | 2,502,328            | <0.0001       |

|                           |                    |                    |                    |                    |                    |         |
|---------------------------|--------------------|--------------------|--------------------|--------------------|--------------------|---------|
|                           | (10.55)            | (12.79)            | (13.99)            | (15.26)            | (15.15)            |         |
| <b>At-risk conditions</b> |                    |                    |                    |                    |                    |         |
| Diabetes*                 | 555,273<br>(14.27) | 797,018<br>(17.70) | 751,733<br>(17.08) | 651,786<br>(17.50) | 592,472<br>(15.51) | <0.0001 |
| Diabetes Type 1 (DM 1)    | 95,807<br>(17.34)  | 127,358<br>(21.00) | 120,380<br>(19.96) | 104,747<br>(19.05) | 94,623<br>(17.01)  | <0.0001 |
| Diabetes Type 2 (DM 2)    | 527,699<br>(14.42) | 756,266<br>(17.87) | 712,947<br>(17.21) | 617,617<br>(17.61) | 560,345<br>(15.60) | <0.0001 |
| Pregnancy                 | 252,018<br>(15.39) | 405,966<br>(17.29) | 339,479<br>(16.77) | 268,975<br>(17.21) | 203,434<br>(16.31) | <0.0001 |

\*Enrollees in this category were diagnosed as either: (1) “DM 1 and DM 2”, (2) “DM 1 or DM2”, or (3) “unspecified diabetes.”

\*\* P values were obtained from the chi-square test to show the significance of vaccination rates across influenza seasons.

**Table S6:** Adjusted Odds Ratio (AOR) and 95% Confidence Intervals for features associated with flu vaccination based on the CCS features

| Feature                                                                                 | Overall (Jul'16-Jun'21) | Pre-COVID (Jul'16-Jun'20) | Peri COVID (Jul'20-Jun'21) |
|-----------------------------------------------------------------------------------------|-------------------------|---------------------------|----------------------------|
| <b>Demographic Characteristics</b>                                                      |                         |                           |                            |
| 7 months - 4 years (vs. 18-65 years)                                                    | 3.40 (3.37, 3.42)       | 3.46 (3.43, 3.48)         | 2.88 (2.86, 2.91)          |
| 5-17 years (vs. 18-65 years)                                                            | 2.11 (2.10, 2.12)       | 2.10 (2.09, 2.11)         | 1.92 (1.91, 1.94)          |
| Male (vs. Female)                                                                       | 0.95 (0.94, 0.95)       | 0.95 (0.95, 0.96)         | 0.94 (0.93, 0.94)          |
| Area with higher education (vs. not)                                                    | 1.00 (1.00, 1.01)       | 1.01 (1.01, 1.01)         | 1.00 (0.99, 1.00)          |
| Metropolitan (vs. Non-Metropolitan)                                                     | 1.02 (1.01, 1.02)       | 0.99 (0.99, 1.00)         | 0.99 (0.98, 1.00)          |
| Medicaid managed care (vs. free-for-service)                                            | 1.16 (1.16, 1.17)       | 1.20 (1.19, 1.20)         | 1.12 (1.11, 1.12)          |
| <b>Health Conditions</b>                                                                |                         |                           |                            |
| Factors Influencing Health Status and Contact with Health Services                      | 2.82 (2.80, 2.83)       | 2.54 (2.53, 2.56)         | 2.72 (2.69, 2.75)          |
| Certain Conditions Originating in the Perinatal Period                                  | 1.86 (1.85, 1.88)       | 1.47 (1.46, 1.48)         | 1.63 (1.61, 1.64)          |
| Diseases of the Eye and Adnexa                                                          | 1.36 (1.35, 1.36)       | 1.36 (1.36, 1.37)         | 1.10 (1.10, 1.11)          |
| Endocrine, Nutritional and Metabolic Diseases                                           | 1.28 (1.28, 1.29)       | 1.28 (1.27, 1.28)         | 1.19 (1.19, 1.20)          |
| Symptoms, Signs and Abnormal Clinical and Laboratory Findings, Not Elsewhere Classified | 1.27 (1.26, 1.28)       | 1.23 (1.23, 1.24)         | 1.08 (1.07, 1.09)          |
| Neoplasms                                                                               | 1.27 (1.26, 1.27)       | 1.27 (1.26, 1.27)         | 1.24 (1.23, 1.25)          |
| Diseases of the Skin and Subcutaneous Tissue                                            | 1.21 (1.21, 1.22)       | 1.20 (1.19, 1.20)         | 1.12 (1.12, 1.13)          |
| Diseases of the Digestive System                                                        | 1.19 (1.19, 1.20)       | 1.19 (1.18, 1.19)         | 1.13 (1.12, 1.13)          |
| Diseases of the Respiratory System                                                      | 1.18 (1.18, 1.19)       | 1.20 (1.20, 1.21)         | 1.02 (1.01, 1.03)          |
| Diseases of the Ear and Mastoid Process                                                 | 1.15 (1.15, 1.16)       | 1.17 (1.16, 1.17)         | 1.02 (1.02, 1.03)          |
| Certain Infectious and Parasitic Diseases                                               | 1.14 (1.13, 1.14)       | 1.14 (1.14, 1.15)         | 1.04 (1.03, 1.04)          |
| Diseases of the Nervous System                                                          | 1.12 (1.12, 1.13)       | 1.12 (1.12, 1.13)         | 1.07 (1.06, 1.07)          |
| Injury, Poisoning and Certain Other Consequences of External Causes                     | 1.12 (1.11, 1.12)       | 1.13 (1.12, 1.13)         | 0.96 (0.96, 0.97)          |
| Pregnancy, Childbirth and the Puerperium                                                | 1.10 (1.09, 1.10)       | 1.12 (1.11, 1.13)         | 0.77 (0.77, 0.78)          |
| Diseases of the Genitourinary System                                                    | 1.04 (1.04, 1.05)       | 1.05 (1.05, 1.06)         | 0.97 (0.96, 0.97)          |
| Diseases of the Musculoskeletal System and Connective Tissue                            | 1.02 (1.02, 1.03)       | 1.04 (1.03, 1.04)         | 0.93 (0.92, 0.93)          |
| External Causes of Morbidity                                                            | 1.02 (1.01, 1.02)       | 1.00 (1.00, 1.00)         | 0.90 (0.89, 0.91)          |



|                                                                                                           |                   |                   |                   |
|-----------------------------------------------------------------------------------------------------------|-------------------|-------------------|-------------------|
| Diseases of the Blood and Blood Forming Organs<br>and Certain Disorders Involving the Immune<br>Mechanism | 1.00 (1.00, 1.01) | 1.03 (1.02, 1.03) | 1.02 (1.01, 1.03) |
| Mental, Behavioral and Neurodevelopmental<br>Disorders                                                    | 0.99 (0.98, 0.99) | 1.00 (0.99, 1.00) | 0.86 (0.85, 0.86) |
| Diseases of the Circulatory System                                                                        | 0.97 (0.96, 0.97) | 0.99 (0.98, 0.99) | 0.94 (0.93, 0.95) |

---

**Table S7.** Adjusted Odds Ratio (AOR) and 95% Confidence Intervals (CI) for all CCSR features used in the logistic regression model with patient number and vaccination prevalence

| CCSR Features                                                                                                                | AOR   | 95%<br>CI<br>Lower | 95%<br>CI<br>Upper | Patients | Prevalence<br>(%) |
|------------------------------------------------------------------------------------------------------------------------------|-------|--------------------|--------------------|----------|-------------------|
| Medical examination/evaluation                                                                                               | 2.071 | 2.062              | 2.08               | 4011557  | 49.91             |
| Liveborn                                                                                                                     | 1.785 | 1.77               | 1.801              | 323914   | 4.03              |
| Antenatal screening                                                                                                          | 1.342 | 1.327              | 1.358              | 384196   | 4.78              |
| Encounter for observation and examination for conditions ruled out (excludes infectious disease, neoplasm, mental disorders) | 1.287 | 1.281              | 1.292              | 1761838  | 21.92             |
| Neoplasm-related encounters                                                                                                  | 1.265 | 1.257              | 1.272              | 971743   | 12.09             |
| Encounter for mental health conditions                                                                                       | 1.255 | 1.243              | 1.267              | 212995   | 2.65              |
| Malposition, disproportion or other labor complications                                                                      | 1.217 | 1.201              | 1.233              | 195313   | 2.43              |
| Refractive error                                                                                                             | 1.215 | 1.21               | 1.22               | 2075303  | 25.82             |
| Cataract and other lens disorders                                                                                            | 1.212 | 1.2                | 1.224              | 253987   | 3.16              |
| Other specified upper respiratory infections                                                                                 | 1.206 | 1.201              | 1.211              | 2568811  | 31.96             |
| Other specified encounters and counseling                                                                                    | 1.184 | 1.178              | 1.189              | 1321378  | 16.44             |
| Other specified status                                                                                                       | 1.181 | 1.176              | 1.186              | 2616233  | 32.55             |
| Abnormal findings without diagnosis                                                                                          | 1.175 | 1.169              | 1.181              | 1761838  | 21.92             |
| Other specified and unspecified skin disorders                                                                               | 1.161 | 1.154              | 1.167              | 946023   | 11.77             |
| Mental and substance use disorders in remission                                                                              | 1.158 | 1.146              | 1.17               | 231482   | 2.88              |
| Symptoms of mental and substance use conditions                                                                              | 1.156 | 1.146              | 1.167              | 290960   | 3.62              |
| Sleep wake disorders                                                                                                         | 1.152 | 1.145              | 1.158              | 962902   | 11.98             |
| Disorders of lipid metabolism                                                                                                | 1.136 | 1.129              | 1.143              | 969332   | 12.06             |
| Personal/family history of disease                                                                                           | 1.134 | 1.128              | 1.14               | 1358351  | 16.9              |
| Supervision of high-risk pregnancy                                                                                           | 1.131 | 1.118              | 1.144              | 283726   | 3.53              |
| Obesity                                                                                                                      | 1.128 | 1.123              | 1.134              | 1370407  | 17.05             |
| Other general signs and symptoms                                                                                             | 1.127 | 1.122              | 1.132              | 2106650  | 26.21             |
| Other specified complications in pregnancy                                                                                   | 1.126 | 1.114              | 1.139              | 434029   | 5.4               |
| Blindness and vision defects                                                                                                 | 1.125 | 1.117              | 1.132              | 511190   | 6.36              |
| Acquired foot deformities                                                                                                    | 1.125 | 1.113              | 1.136              | 221837   | 2.76              |
| Viral infection                                                                                                              | 1.125 | 1.12               | 1.131              | 1257077  | 15.64             |
| Maternal outcome of delivery                                                                                                 | 1.117 | 1.104              | 1.131              | 442870   | 5.51              |
| Intestinal infection                                                                                                         | 1.113 | 1.104              | 1.123              | 310250   | 3.86              |
| Other specified inflammatory condition of skin                                                                               | 1.111 | 1.104              | 1.117              | 740261   | 9.21              |
| Cornea and external disease                                                                                                  | 1.11  | 1.104              | 1.116              | 1001482  | 12.46             |
| Respiratory signs and symptoms                                                                                               | 1.107 | 1.102              | 1.112              | 2672496  | 33.25             |
| Miscellaneous mental and behavioral disorders/conditions                                                                     | 1.106 | 1.095              | 1.116              | 251576   | 3.13              |
| Noninfectious gastroenteritis                                                                                                | 1.105 | 1.096              | 1.113              | 405094   | 5.04              |
| Allergic reactions                                                                                                           | 1.105 | 1.1                | 1.11               | 1723257  | 21.44             |
| Maternal care related to fetal conditions                                                                                    | 1.104 | 1.091              | 1.117              | 271670   | 3.38              |
| Asthma                                                                                                                       | 1.104 | 1.098              | 1.11               | 978977   | 12.18             |
| Other specified and unspecified nutritional and metabolic disorders                                                          | 1.102 | 1.094              | 1.11               | 385000   | 4.79              |
| Benign neoplasms                                                                                                             | 1.102 | 1.095              | 1.11               | 593173   | 7.38              |
| Genitourinary signs and symptoms                                                                                             | 1.096 | 1.09               | 1.103              | 996660   | 12.4              |

|                                                                                |       |       |       |         |       |
|--------------------------------------------------------------------------------|-------|-------|-------|---------|-------|
| Abdominal pain and other digestive/abdomen signs and symptoms                  | 1.091 | 1.086 | 1.097 | 2417704 | 30.08 |
| Other specified bone disease and musculoskeletal deformities                   | 1.09  | 1.08  | 1.099 | 280511  | 3.49  |
| Other specified and unspecified gastrointestinal disorders                     | 1.087 | 1.081 | 1.093 | 907443  | 11.29 |
| Neurodevelopmental disorders                                                   | 1.087 | 1.081 | 1.092 | 1256274 | 15.63 |
| Urinary incontinence                                                           | 1.086 | 1.076 | 1.095 | 290960  | 3.62  |
| Other specified and unspecified disorders of the ear                           | 1.084 | 1.078 | 1.091 | 839927  | 10.45 |
| Hearing loss                                                                   | 1.083 | 1.073 | 1.093 | 254791  | 3.17  |
| Musculoskeletal pain, not low back pain                                        | 1.082 | 1.077 | 1.087 | 2567204 | 31.94 |
| Uncomplicated pregnancy, delivery or puerperium                                | 1.08  | 1.069 | 1.091 | 683194  | 8.5   |
| Fracture of the upper limb, subsequent encounter                               | 1.077 | 1.063 | 1.091 | 199332  | 2.48  |
| Other aftercare encounter                                                      | 1.075 | 1.069 | 1.082 | 798935  | 9.94  |
| Other specified and unspecified lower respiratory disease                      | 1.075 | 1.066 | 1.084 | 369728  | 4.6   |
| Contraceptive and procreative management                                       | 1.075 | 1.068 | 1.082 | 856806  | 10.66 |
| Other specified and unspecified diseases of kidney and ureters                 | 1.074 | 1.064 | 1.084 | 318288  | 3.96  |
| Esophageal disorders                                                           | 1.073 | 1.066 | 1.08  | 856002  | 10.65 |
| External cause codes: fall; initial encounter                                  | 1.073 | 1.066 | 1.08  | 583528  | 7.26  |
| Fungal infections                                                              | 1.07  | 1.062 | 1.077 | 520835  | 6.48  |
| Retinal and vitreous conditions                                                | 1.069 | 1.057 | 1.08  | 218622  | 2.72  |
| Other specified male genital disorders                                         | 1.066 | 1.055 | 1.077 | 218622  | 2.72  |
| Diabetes mellitus with complication                                            | 1.063 | 1.055 | 1.072 | 589154  | 7.33  |
| Open wounds of head and neck, initial encounter                                | 1.061 | 1.052 | 1.07  | 315877  | 3.93  |
| Diseases of mouth; excluding dental                                            | 1.06  | 1.052 | 1.068 | 376158  | 4.68  |
| Oculofacial plastics and orbital conditions                                    | 1.058 | 1.049 | 1.068 | 273277  | 3.4   |
| Nervous system pain and pain syndromes                                         | 1.058 | 1.051 | 1.065 | 840731  | 10.46 |
| Skin/Subcutaneous signs and symptoms                                           | 1.056 | 1.051 | 1.061 | 1229750 | 15.3  |
| Depressive disorders                                                           | 1.056 | 1.05  | 1.062 | 1416222 | 17.62 |
| Other specified eye disorders                                                  | 1.048 | 1.038 | 1.059 | 217014  | 2.7   |
| Lifestyle/life management factors                                              | 1.048 | 1.04  | 1.055 | 545751  | 6.79  |
| Osteoarthritis                                                                 | 1.047 | 1.04  | 1.055 | 610856  | 7.6   |
| Tendon and synovial disorders                                                  | 1.045 | 1.036 | 1.053 | 417150  | 5.19  |
| Hemorrhoids                                                                    | 1.045 | 1.034 | 1.056 | 217818  | 2.71  |
| Socioeconomic/psychosocial factors                                             | 1.036 | 1.029 | 1.043 | 503956  | 6.27  |
| Circulatory signs and symptoms                                                 | 1.034 | 1.029 | 1.04  | 1198403 | 14.91 |
| Nervous system signs and symptoms                                              | 1.034 | 1.028 | 1.04  | 922714  | 11.48 |
| Other specified and unspecified liver disease                                  | 1.03  | 1.021 | 1.039 | 385803  | 4.8   |
| Headache; including migraine                                                   | 1.03  | 1.025 | 1.035 | 1321378 | 16.44 |
| Otitis media                                                                   | 1.03  | 1.025 | 1.035 | 1167860 | 14.53 |
| External cause codes: place of occurrence of the external cause                | 1.026 | 1.015 | 1.036 | 254791  | 3.17  |
| Open wounds to limbs, initial encounter                                        | 1.026 | 1.019 | 1.034 | 471806  | 5.87  |
| Other specified connective tissue disease                                      | 1.026 | 1.02  | 1.033 | 876096  | 10.9  |
| Other specified and unspecified upper respiratory disease                      | 1.026 | 1.019 | 1.034 | 455730  | 5.67  |
| External cause codes: other specified, classifiable and NEC; initial encounter | 1.024 | 1.015 | 1.033 | 289352  | 3.6   |
| External cause codes: activity codes                                           | 1.024 | 1.014 | 1.034 | 275689  | 3.43  |
| Nonmalignant breast conditions                                                 | 1.022 | 1.014 | 1.031 | 329540  | 4.1   |

|                                                             |       |       |       |         |       |
|-------------------------------------------------------------|-------|-------|-------|---------|-------|
| Syncope                                                     | 1.022 | 1.013 | 1.031 | 319895  | 3.98  |
| Fluid and electrolyte disorders                             | 1.021 | 1.013 | 1.028 | 710522  | 8.84  |
| Contact dermatitis                                          | 1.021 | 1.013 | 1.03  | 331148  | 4.12  |
| Gastritis and duodenitis                                    | 1.021 | 1.012 | 1.03  | 363298  | 4.52  |
| Hypertension with complications and secondary hypertension  | 1.019 | 1.009 | 1.03  | 299801  | 3.73  |
| Other unspecified injury                                    | 1.015 | 1.01  | 1.021 | 1243414 | 15.47 |
| Pleurisy, pleural effusion and pulmonary collapse           | 1.014 | 1.004 | 1.024 | 315877  | 3.93  |
| Diabetes mellitus without complication                      | 1.014 | 1.007 | 1.022 | 712129  | 8.86  |
| Other specified joint disorders                             | 1.013 | 1.005 | 1.02  | 519227  | 6.46  |
| Bacterial infections                                        | 1.012 | 1.006 | 1.017 | 985407  | 12.26 |
| Hematuria                                                   | 1.01  | 1     | 1.02  | 257202  | 3.2   |
| Nerve and nerve root disorders                              | 1.009 | 1     | 1.018 | 308643  | 3.84  |
| Cardiac dysrhythmias                                        | 1.007 | 0.998 | 1.016 | 359279  | 4.47  |
| Abdominal hernia                                            | 1.007 | 0.998 | 1.016 | 319895  | 3.98  |
| Pneumonia (except that caused by tuberculosis)              | 1.003 | 0.994 | 1.011 | 403486  | 5.02  |
| Encounter for administrative purposes                       | 1.003 | 0.996 | 1.01  | 555396  | 6.91  |
| Acute and unspecified renal failure                         | 1     | 0.989 | 1.011 | 247557  | 3.08  |
| Nutritional anemia                                          | 0.996 | 0.987 | 1.004 | 333559  | 4.15  |
| Nausea and vomiting                                         | 0.996 | 0.991 | 1.002 | 1396931 | 17.38 |
| Hepatitis                                                   | 0.996 | 0.985 | 1.007 | 223444  | 2.78  |
| Superficial injury; contusion, initial encounter            | 0.995 | 0.99  | 1.001 | 1044082 | 12.99 |
| Chronic obstructive pulmonary disease and bronchiectasis    | 0.995 | 0.987 | 1.004 | 455730  | 5.67  |
| Fever                                                       | 0.994 | 0.989 | 0.999 | 1135710 | 14.13 |
| Skin and subcutaneous tissue infections                     | 0.994 | 0.989 | 1     | 971743  | 12.09 |
| Anxiety and fear-related disorders                          | 0.994 | 0.989 | 1     | 1549646 | 19.28 |
| Other specified and unspecified endocrine disorders         | 0.992 | 0.983 | 1.002 | 269259  | 3.35  |
| Respiratory failure; insufficiency; arrest                  | 0.988 | 0.978 | 0.998 | 319895  | 3.98  |
| Sinusitis                                                   | 0.988 | 0.983 | 0.994 | 914676  | 11.38 |
| External cause codes: unspecified mechanism                 | 0.987 | 0.977 | 0.998 | 236304  | 2.94  |
| Diseases of middle ear and mastoid (except otitis media)    | 0.986 | 0.976 | 0.996 | 222641  | 2.77  |
| General sensation/perception signs and symptoms             | 0.985 | 0.978 | 0.992 | 590762  | 7.35  |
| Implant, device or graft related encounter                  | 0.985 | 0.979 | 0.991 | 843142  | 10.49 |
| Biliary tract disease                                       | 0.983 | 0.974 | 0.993 | 282922  | 3.52  |
| Nutritional deficiencies                                    | 0.983 | 0.977 | 0.99  | 656670  | 8.17  |
| External cause codes: struck by; against; initial encounter | 0.981 | 0.972 | 0.99  | 288549  | 3.59  |
| Acquired absence of limb or organ                           | 0.976 | 0.966 | 0.987 | 204958  | 2.55  |
| Other specified nervous system disorders                    | 0.975 | 0.965 | 0.985 | 263632  | 3.28  |
| Gastrointestinal hemorrhage                                 | 0.974 | 0.965 | 0.984 | 292568  | 3.64  |
| Acute and chronic tonsillitis                               | 0.974 | 0.966 | 0.981 | 353653  | 4.4   |
| Sprains and strains, initial encounter                      | 0.968 | 0.962 | 0.974 | 1016754 | 12.65 |
| Essential hypertension                                      | 0.967 | 0.961 | 0.972 | 1215282 | 15.12 |
| Suicidal ideation/attempt/intentional self-harm             | 0.966 | 0.956 | 0.976 | 257202  | 3.2   |
| Other specified and unspecified mood disorders              | 0.966 | 0.956 | 0.976 | 229071  | 2.85  |
| Nonspecific chest pain                                      | 0.965 | 0.959 | 0.97  | 1179917 | 14.68 |
| Diseases of white blood cells                               | 0.965 | 0.957 | 0.974 | 327933  | 4.08  |
| Fracture of the lower limb (except hip), initial encounter  | 0.964 | 0.954 | 0.973 | 245950  | 3.06  |
| Spondylopathies/spondyloarthropathy (including infective)   | 0.963 | 0.957 | 0.969 | 1333435 | 16.59 |

|                                                                      |       |       |       |         |       |
|----------------------------------------------------------------------|-------|-------|-------|---------|-------|
| Trauma- and stressor-related disorders                               | 0.963 | 0.958 | 0.969 | 1080251 | 13.44 |
| Muscle disorders                                                     | 0.962 | 0.954 | 0.97  | 452515  | 5.63  |
| Low back pain                                                        | 0.961 | 0.955 | 0.967 | 1034436 | 12.87 |
| Septicemia                                                           | 0.96  | 0.949 | 0.971 | 244342  | 3.04  |
| Influenza                                                            | 0.956 | 0.95  | 0.963 | 540125  | 6.72  |
| Fracture of the upper limb, initial encounter                        | 0.953 | 0.943 | 0.963 | 351242  | 4.37  |
| Disorders of teeth and gingiva                                       | 0.95  | 0.945 | 0.956 | 662296  | 8.24  |
| External cause codes: motor vehicle traffic (MVT); initial encounter | 0.949 | 0.939 | 0.96  | 212995  | 2.65  |
| Aplastic anemia                                                      | 0.945 | 0.937 | 0.952 | 473413  | 5.89  |
| Thyroid disorders                                                    | 0.943 | 0.936 | 0.949 | 606837  | 7.55  |
| Disruptive, impulse-control and conduct disorders                    | 0.94  | 0.932 | 0.949 | 328737  | 4.09  |
| Dysphagia                                                            | 0.934 | 0.925 | 0.944 | 242735  | 3.02  |
| Other specified substance-related disorders                          | 0.931 | 0.921 | 0.942 | 274885  | 3.42  |
| Neoplasms of unspecified nature or uncertain behavior                | 0.929 | 0.919 | 0.939 | 208173  | 2.59  |
| Malaise and fatigue                                                  | 0.925 | 0.92  | 0.931 | 1026399 | 12.77 |
| Stimulant-related disorders                                          | 0.922 | 0.912 | 0.931 | 355261  | 4.42  |
| Alcohol-related disorders                                            | 0.92  | 0.913 | 0.928 | 521639  | 6.49  |
| Acute bronchitis                                                     | 0.915 | 0.91  | 0.921 | 793309  | 9.87  |
| Other specified female genital disorders                             | 0.914 | 0.908 | 0.921 | 762766  | 9.49  |
| Urinary tract infections                                             | 0.913 | 0.908 | 0.919 | 980585  | 12.2  |
| Calculus of urinary tract                                            | 0.912 | 0.902 | 0.923 | 208977  | 2.6   |
| Coronary atherosclerosis and other heart disease                     | 0.909 | 0.9   | 0.918 | 309446  | 3.85  |
| Benign ovarian cyst                                                  | 0.907 | 0.897 | 0.917 | 209780  | 2.61  |
| Chronic kidney disease                                               | 0.904 | 0.895 | 0.914 | 292568  | 3.64  |
| Cannabis-related disorders                                           | 0.901 | 0.892 | 0.91  | 315877  | 3.93  |
| Biomechanical lesions                                                | 0.9   | 0.89  | 0.91  | 212192  | 2.64  |
| Heart failure                                                        | 0.893 | 0.883 | 0.903 | 253183  | 3.15  |
| Menstrual disorders                                                  | 0.89  | 0.884 | 0.896 | 667923  | 8.31  |
| Epilepsy; convulsions                                                | 0.888 | 0.88  | 0.895 | 410720  | 5.11  |
| Tobacco-related disorders                                            | 0.873 | 0.867 | 0.879 | 836712  | 10.41 |
| Bipolar and related disorders                                        | 0.871 | 0.864 | 0.878 | 503956  | 6.27  |
| Schizophrenia spectrum and other psychotic disorders                 | 0.838 | 0.83  | 0.845 | 415543  | 5.17  |
| Opioid-related disorders                                             | 0.833 | 0.826 | 0.84  | 498330  | 6.2   |
| Inflammatory diseases of female pelvic organs                        | 0.83  | 0.824 | 0.836 | 606033  | 7.54  |
| Gestational weeks                                                    | 0.772 | 0.764 | 0.781 | 727401  | 9.05  |
| No immunization or underimmunization                                 | 0.617 | 0.611 | 0.624 | 192901  | 2.4   |
